# Supplementary material for: Iridium-Doped Nanosized Zn–Al Layered Double Hydroxides as Efficient Water Oxidation Catalysts
Source: PubMed Central journal article supplement (PMC8008397; doi:10.1021/acsami.0c07925), 2020-06-25
Supplement: am0c07925_si_001.pdf [file am0c07925_si_001.pdf]

## Supporting Information

# Iridium-Doped Nanosized Zn–Al Layered Double Hydroxides as Efficient Water Oxidation Catalysts

Lucia Fagiolari,<sup>a,†</sup> Marzia Bini,<sup>b</sup> Ferdinando Costantino,<sup>a</sup> Giordano Gatto,<sup>a</sup> A. Jeremy Kropf,<sup>c</sup> Fabio Marmottini,<sup>a</sup>  
Morena Nocchetti,<sup>b</sup> Evan C. Wegener,<sup>c</sup> Francesco Zaccaria,<sup>a</sup> Massimiliano Delferro,<sup>\*c</sup> Riccardo Vivani,<sup>\*b</sup>  
Alceo Macchioni<sup>\*a</sup>

<sup>a</sup>Department of Chemistry, Biology and Biotechnology, University of Perugia and CIRCC, Via Elce di Sotto, 8, I-06123 Perugia, Italy;

<sup>b</sup>Department of Pharmaceutical Sciences and CEMIN, University of Perugia, Via Fabretti 48, I- 06123 Perugia, Italy;

<sup>c</sup>Chemical Sciences and Engineering Division, Argonne National Laboratory, Argonne, Illinois 60439, United States of America

\* Email for A. M.: [alceo.macchioni@unipg.it](mailto:alceo.macchioni@unipg.it)

\* Email for R. V.: [riccardo.vivani@unipg.it](mailto:riccardo.vivani@unipg.it)

\* Email for M. D.: [delferro@anl.gov](mailto:delferro@anl.gov)

## Summary

- Synthetic details .....2
- Characterization details.....3
- Kinetic plots for NaIO<sub>4</sub>-driven WO..... 10

- Synthetic details

**Table S1.** Comparison of molar composition of reaction solution and solid products relative to the synthesis of **1-4**.

| Sample   | Solution (mol%) |      |     | Solid (mol %) |      |     |
|----------|-----------------|------|-----|---------------|------|-----|
|          | Zn              | Al   | Ir  | Zn            | Al   | Ir  |
| <b>1</b> | 69.6            | 30.0 | 0.4 | 64.5          | 35.0 | 0.5 |
| <b>2</b> | 70.0            | 29.0 | 1.0 | 72.4          | 26.5 | 1.1 |
| <b>3</b> | 67.0            | 30.5 | 2.5 | 66.0          | 31.0 | 3.0 |
| <b>4</b> | 69.7            | 25.6 | 4.7 | 64.7          | 34.9 | 0.4 |

Concentrations are expressed in mol% with respect to the total metal content.

**Table S2.** Composition of oil and aqueous phase for microemulsions used for the synthesis of **1-3**.

| Ir-LDH   | Microemulsion | Oil phase                                           | Aqueous phase                                                                                                                              |
|----------|---------------|-----------------------------------------------------|--------------------------------------------------------------------------------------------------------------------------------------------|
| <b>1</b> | A             | 6.25 g CTABr<br>7.8 ml n-butanol<br>18 ml isooctane | 6.75 ml of 0.525 M salt solution (0.3654 M ZnCl <sub>2</sub> , 0.1575 M AlCl <sub>3</sub> •6H <sub>2</sub> O, 2.1 mM IrCl <sub>3</sub> )   |
|          | B             | 6.25 g CTABr<br>7.8 ml n-butanol<br>18 ml isooctane | 6.75 ml of 1.25 M NH <sub>3</sub> solution                                                                                                 |
| <b>2</b> | A             | 6.25 g CTABr<br>7.8 ml n-butanol<br>18 ml isooctane | 6.75 ml of 0.525 M salt solution (0.3675 M ZnCl <sub>2</sub> , 0.1522 M AlCl <sub>3</sub> •6H <sub>2</sub> O, 5.2 mM IrCl <sub>3</sub> )   |
|          | B             | 6.25 g CTABr<br>7.8 ml n-butanol<br>18 ml isooctane | 6.75 ml of 1.25 M NH <sub>3</sub> solution                                                                                                 |
| <b>3</b> | A             | 6.25 g CTABr<br>7.8 ml n-butanol<br>18 ml isooctane | 6.75 ml of 0.525 M salt solution (0.3502 M ZnCl <sub>2</sub> , 0.1606 M AlCl <sub>3</sub> •6H <sub>2</sub> O, 0.0142 M IrCl <sub>3</sub> ) |
|          | B             | 6.25 g CTABr<br>7.8 ml n-butanol<br>18 ml isooctane | 6.75 ml of 1.25 M NH <sub>3</sub> solution                                                                                                 |

- Characterization details

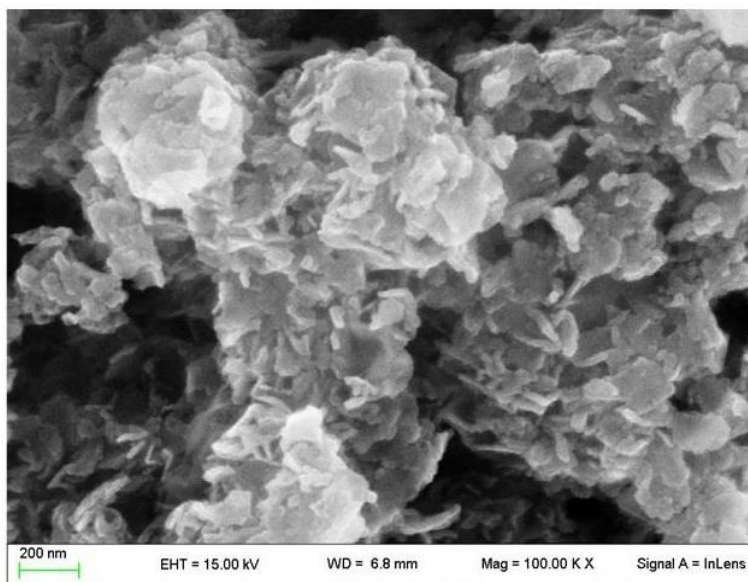

Figure S1. FE-SEM images of 1.

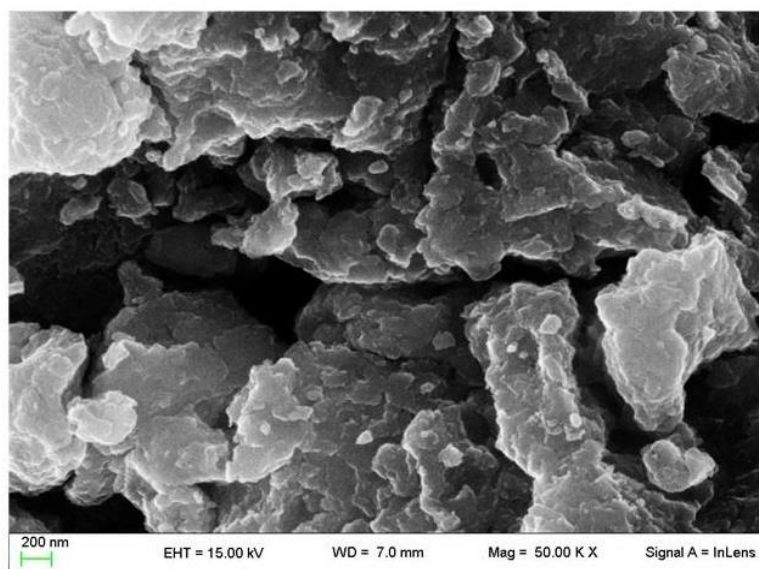

Figure S2. FE-SEM images of 3.

**Table S3.** Surface area and mesopore volume obtained from N<sub>2</sub> adsorption and desorption measurements.

| Sample | B.E.T.                           | BJH                                  |
|--------|----------------------------------|--------------------------------------|
|        | Surface area (m <sup>2</sup> /g) | Mesopore volume (cm <sup>3</sup> /g) |
| 1      | 140                              | 0.31                                 |
| 2      | 45                               | 0.08                                 |
| 3      | 52                               | 0.10                                 |
| 4      | 10                               | 0.01                                 |

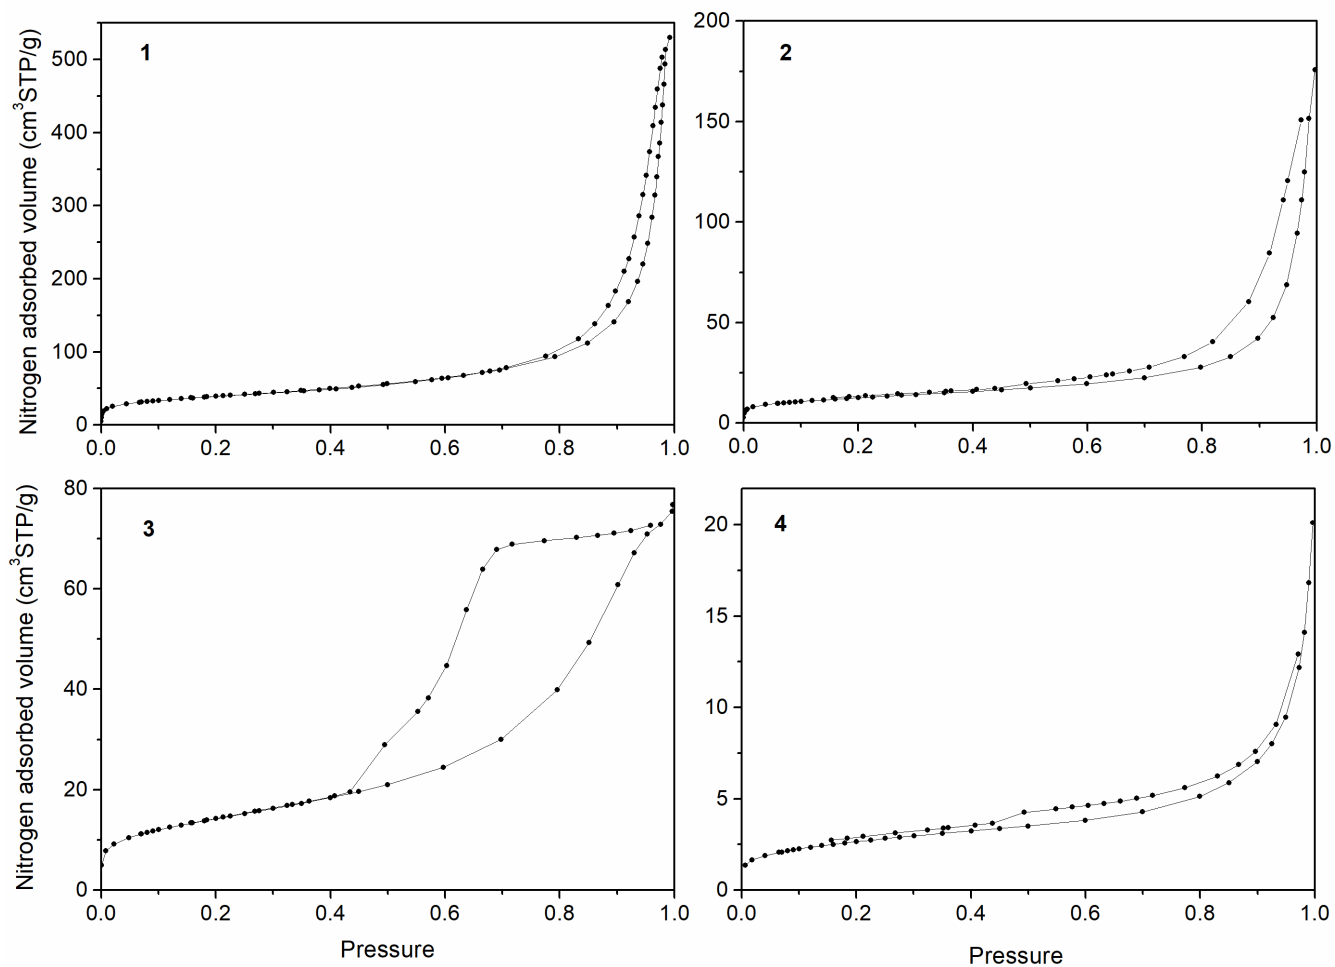

**Figure S3.** N<sub>2</sub> adsorption-desorption isotherm plots for 1-4.

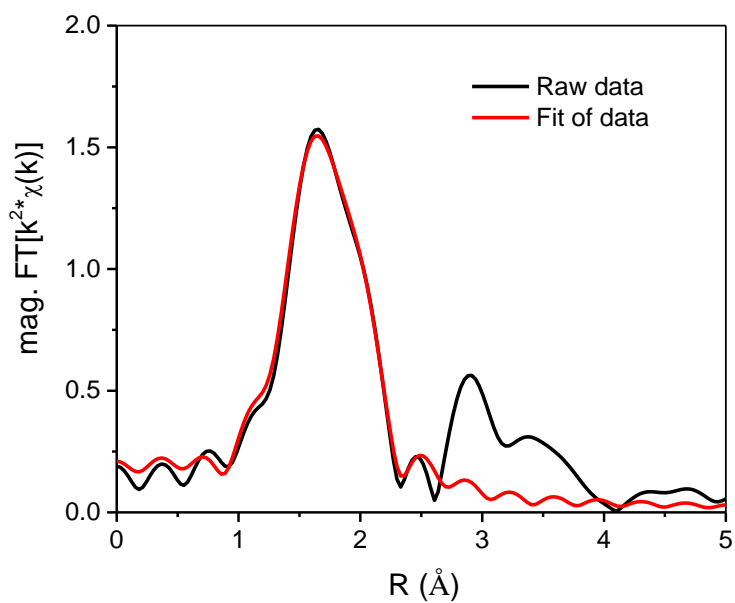

**Figure S4.** The magnitude of the Fourier transform of the  $k^2$ -weighted EXAFS of **2**: raw data (black) and two-path-fit of the first scattering shell (red).

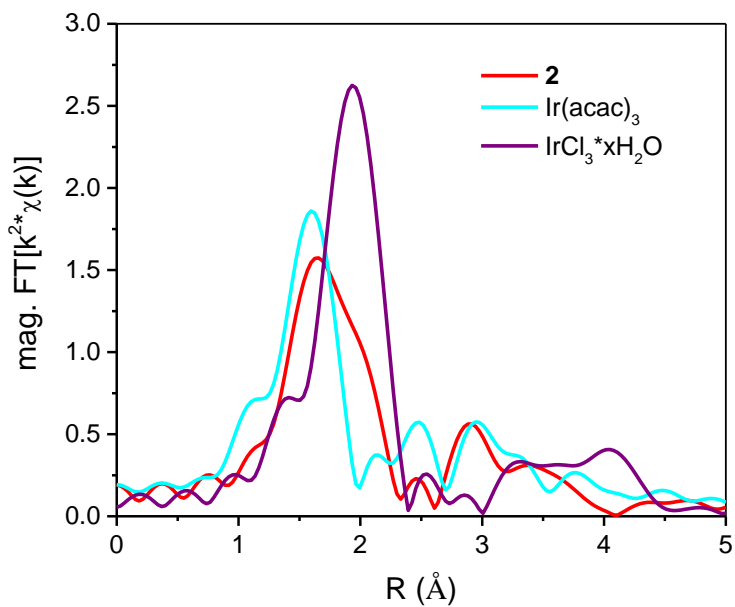

**Figure S5.** The magnitude of the Fourier transform of the  $k^2$ -weighted EXAFS of **2** and reference Ir(III) species like  $\text{Ir}(\text{acac})_3$  and  $\text{IrCl}_3$ .

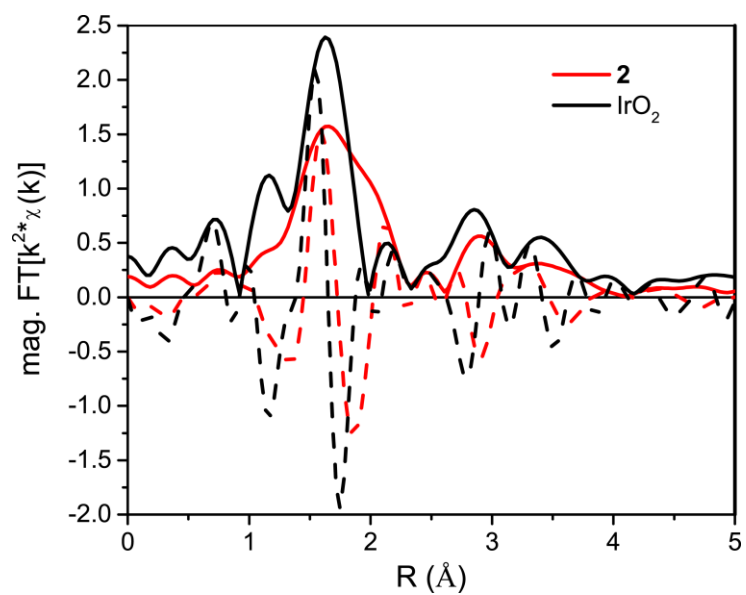

**Figure S6.** The magnitude (solid) and imaginary part (dashed) of the Fourier transform of the  $k^2$ -weighted EXAFS of **2** and  $\text{IrO}_2$ .

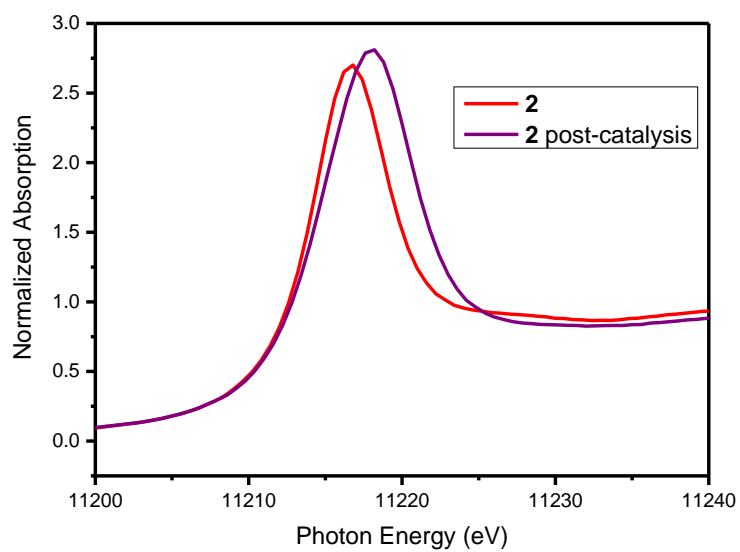

**Figure S7.**  $\text{Ir L}_3$  edge XANES of **2** before and after catalytic run.

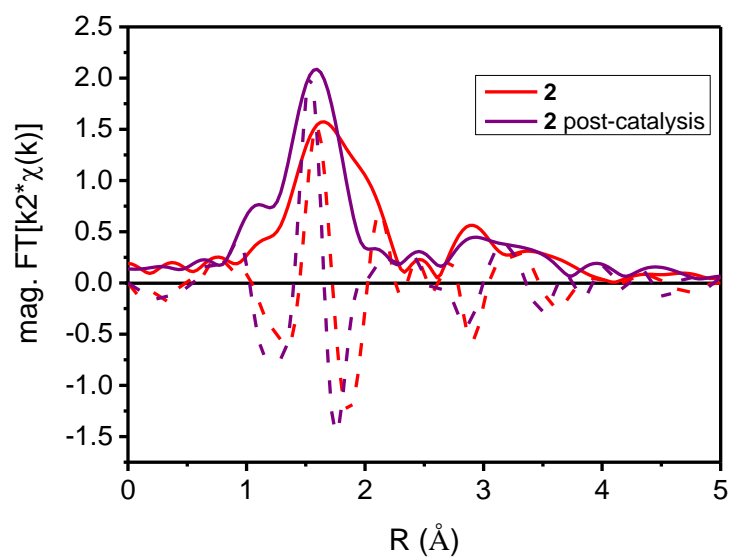

**Figure S8.** The magnitude (solid) and imaginary part (dashed) of the Fourier transform of the  $k^2$ -weighted EXAFS of **2** before and after catalytic run.

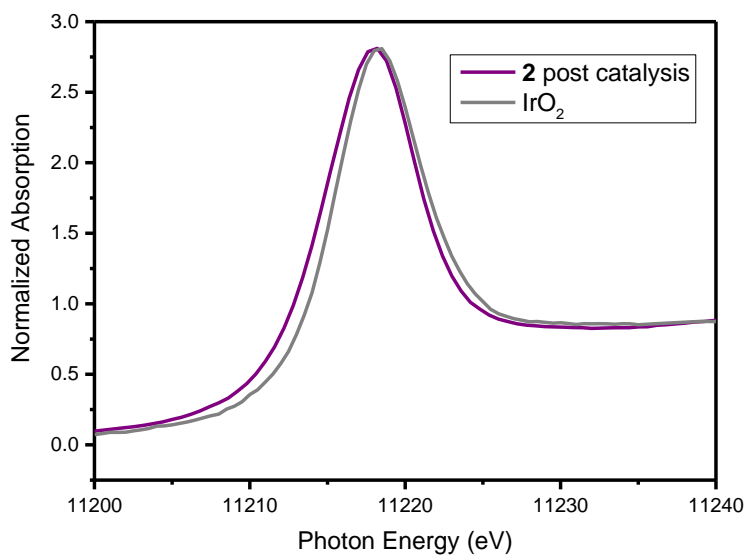

**Figure S9.** Ir  $L_3$  edge XANES of **2** recovered after catalytic run in unbuffered water and reference  $\text{IrO}_2$ .

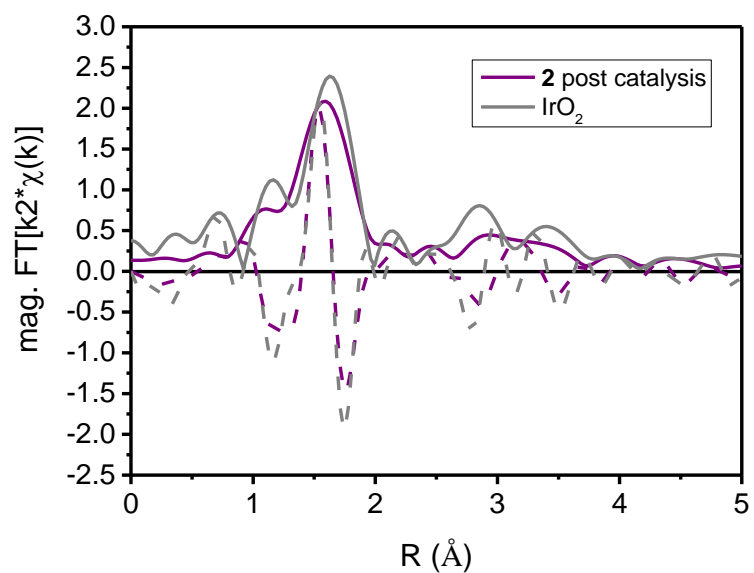

**Figure S10.** The magnitude (solid) and imaginary part (dashed) of the Fourier transform of the  $k^2$ -weighted EXAFS of **2** after catalytic run and reference  $\text{IrO}_2$ .

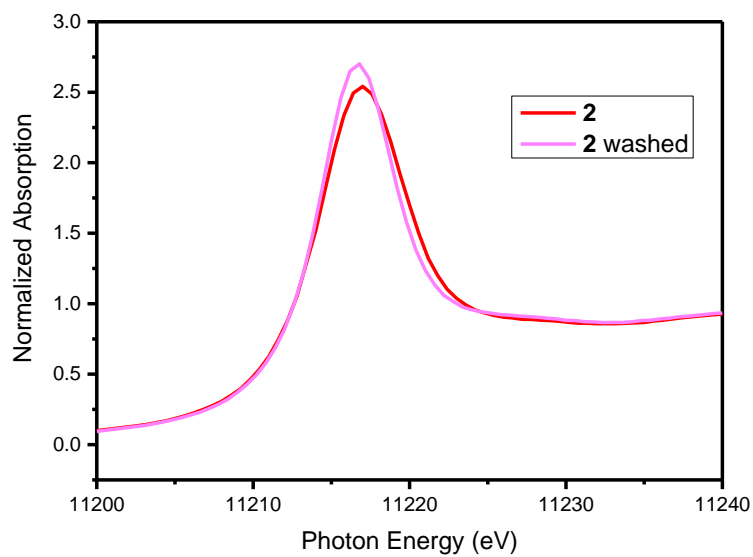

**Figure S11.** Ir  $L_3$  edge XANES of **2** before and after extensive washing with water at 80°C (see caption of Figure S10 for details).



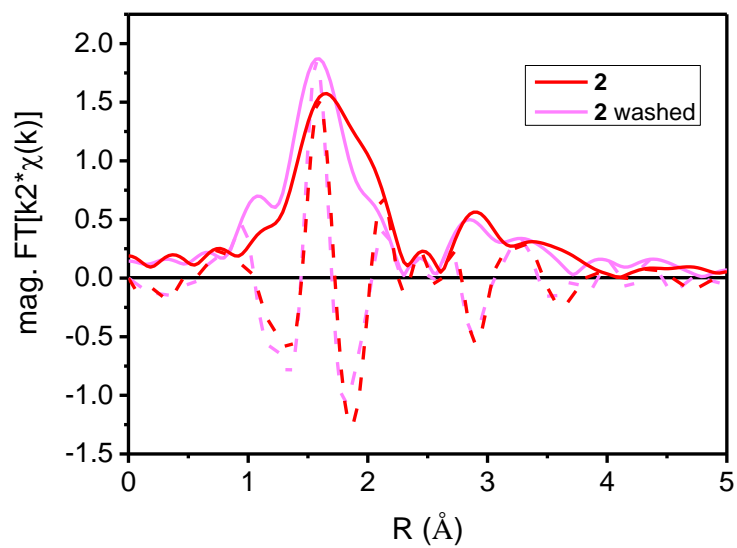

**Figure S12.** The magnitude (solid) and imaginary part (dashed) of the Fourier transform of the  $k^2$ -weighted EXAFS of **2** before and after extensive washing with water at 80°C. XANES Energies and EXAFS coordination parameters for **2** washed: Edge Energy (eV) = 11 214.6;  $S_0^2 = 0.78$ ; CN =  $5.9 \pm 0.5$  (Ir–O);  $R$  (Å) =  $1.98 \pm 0.01$ ;  $\sigma^2$  ( $10^{-3} \text{ \AA}^2$ ) =  $2.5 \pm 1.1$ ;  $E^0$  (eV) =  $6.3 \pm 1.1$ ; R-factor = k1: 0.003, k2: 0.006, k3: 0.009.

- Kinetic plots for  $\text{NaIO}_4$ -driven WO

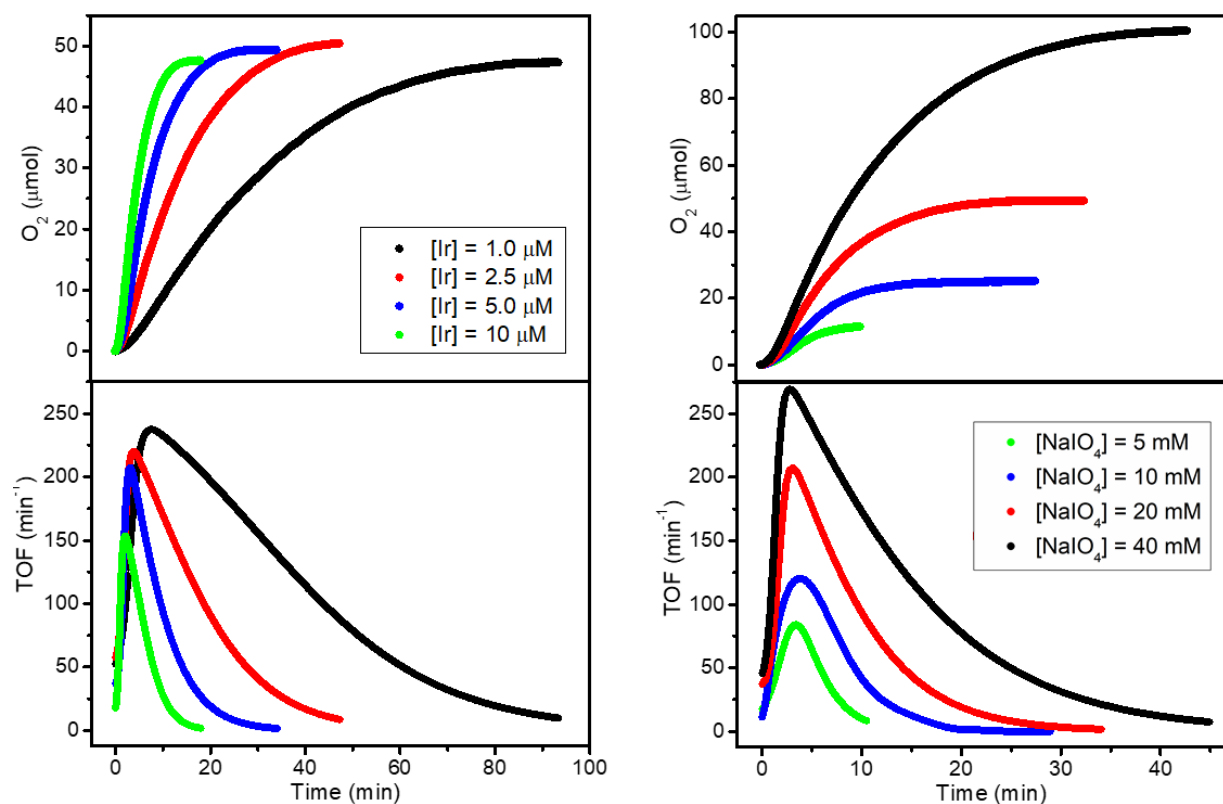

**Figure S13.** Kinetic profiles for WO by catalyst 1 (pH 7 by phosphate buffer, 25°C) at different catalyst (left) and  $\text{NaIO}_4$  (right) concentrations.

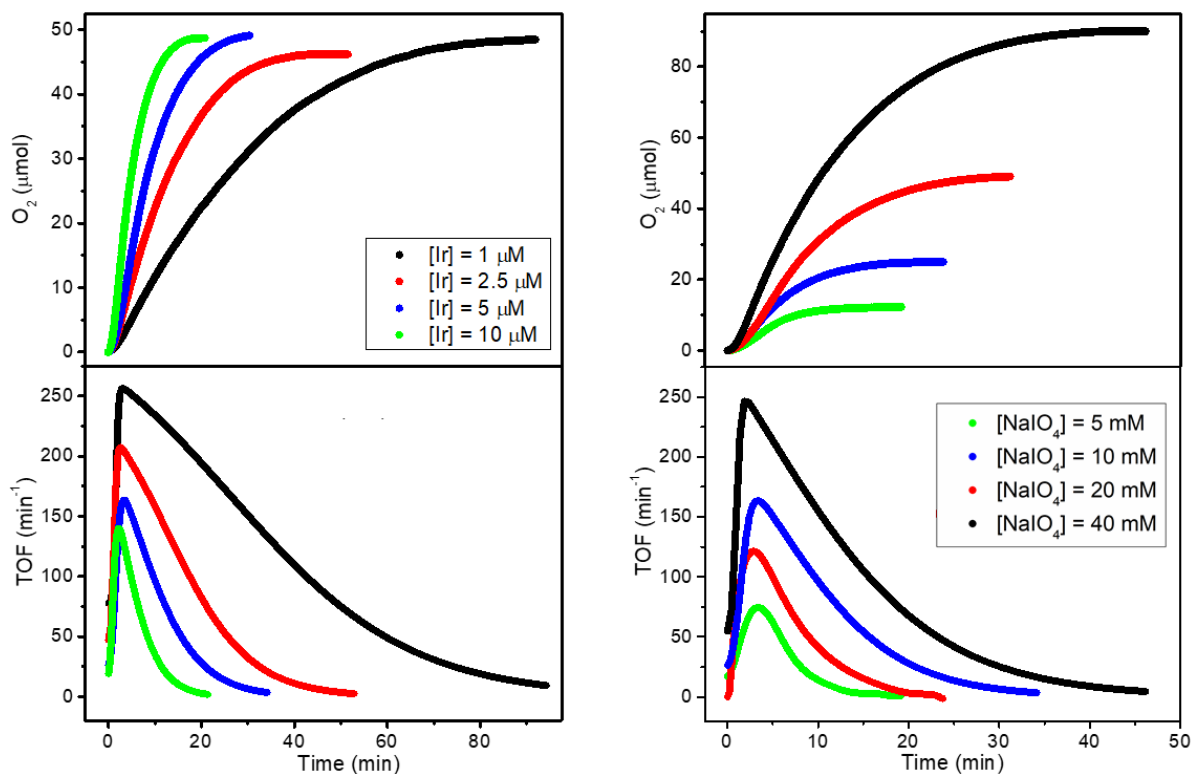

**Figure S14.** Kinetic profiles for WO by catalyst **2** (pH 7 by phosphate buffer, 25°C) at different catalyst (left) and NaIO<sub>4</sub> (right) concentrations.

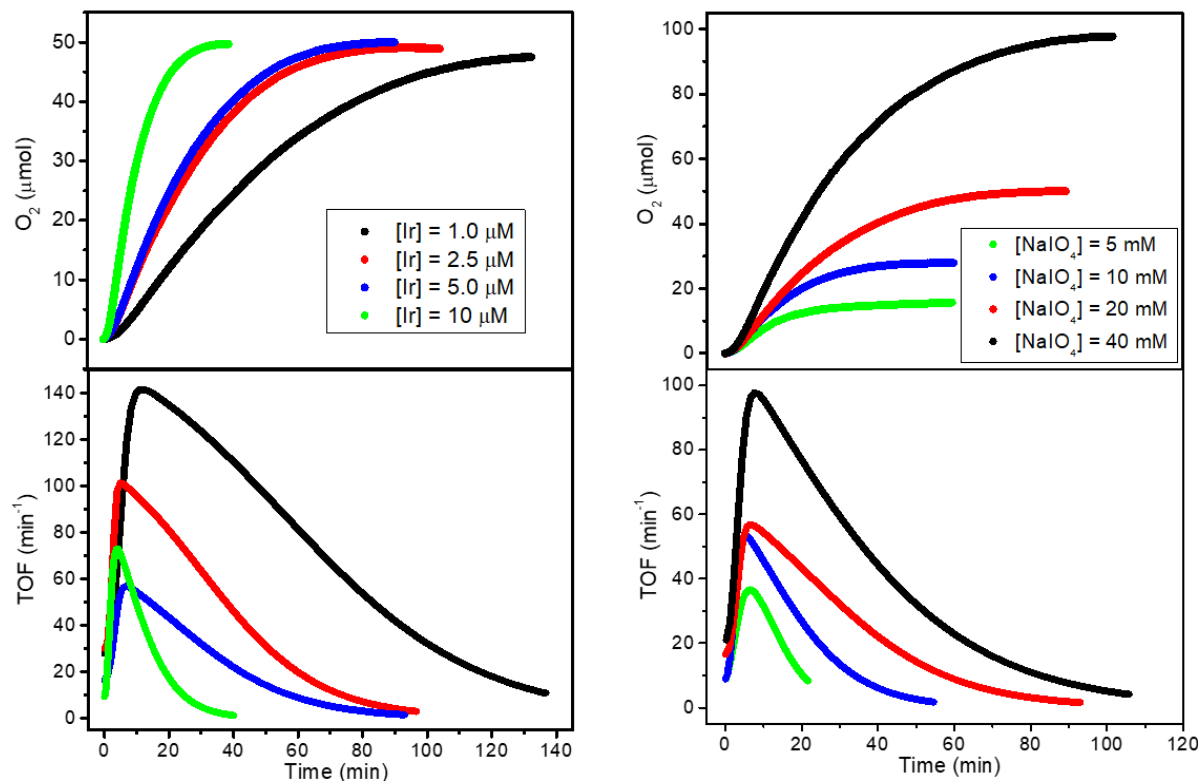

**Figure S15.** Kinetic profiles for WO by catalyst **4** (pH 7 by phosphate buffer, 25°C) at different catalyst (left) and NaIO<sub>4</sub> (right) concentrations.

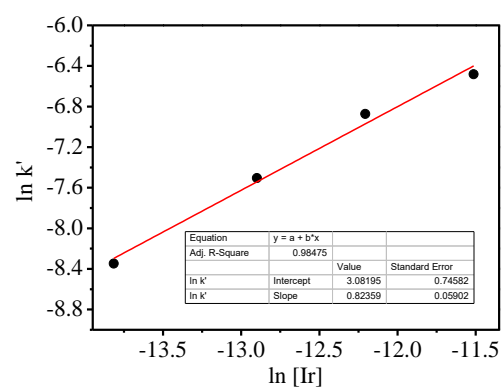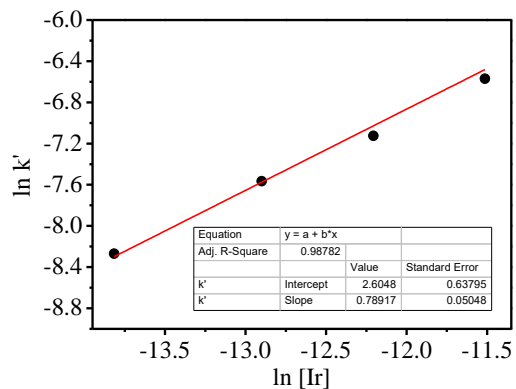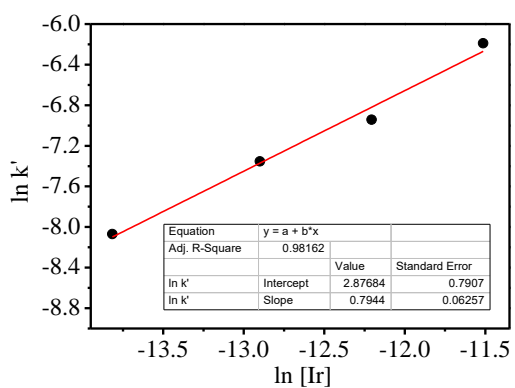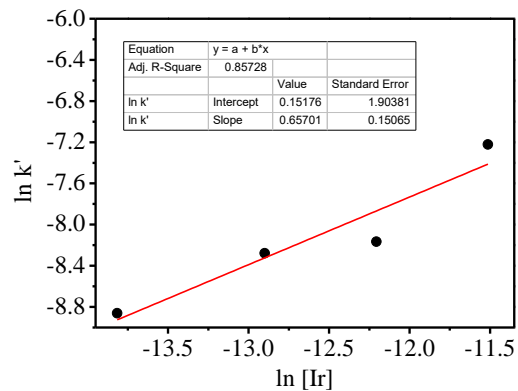

**Figure S16.**  $\log k' - \log [Ir]$  plot for catalysts **1** (up left) **2**, (up right), **3** (down left) and **4** (down right). ( $[NaIO_4] = 20$  mM;  $[Ir] = 1.0, 2.5, 5.0, 10$   $\mu$ M; pH 7 by phosphate buffer).

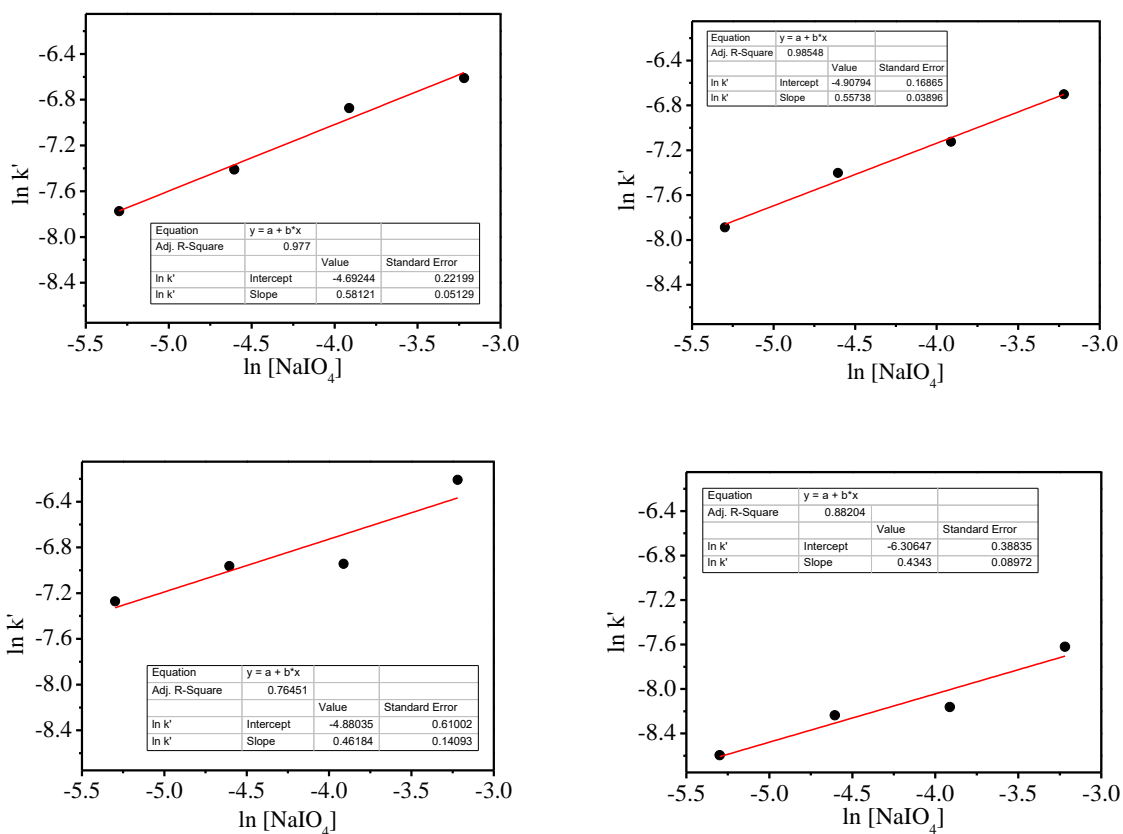

**Figure S17.**  $\log k' - \log [\text{NaIO}_4]$  plot for catalysts 1 (up left) 2, (up right), 3 (down left) and 4 (down right). ( $[\text{Ir}] = 5 \mu\text{M}$   $[\text{NaIO}_4] = 5.0, 10, 20, 40 \text{ mM}$ ; pH 7 by phosphate buffer).

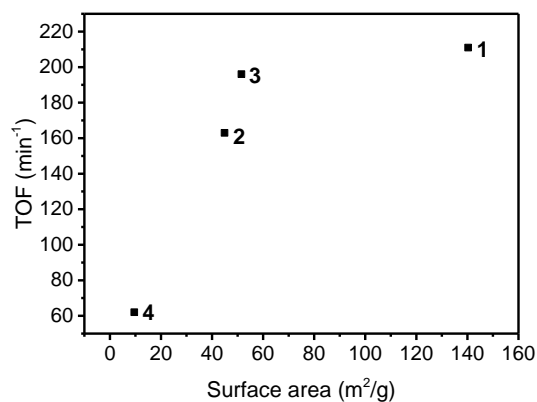

**Figure S18.** Comparison of TOFs ( $[\text{Ir}] = 5 \mu\text{M}$ ,  $[\text{NaIO}_4] = 20 \text{ mM}$ ) vs. BET surface area for catalysts 1-4.

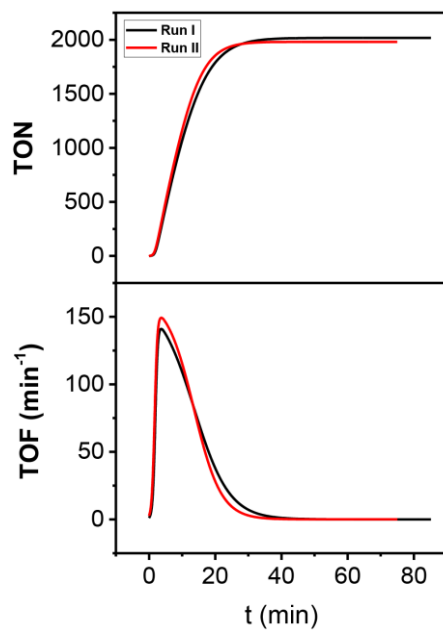

**Figure S19.** Comparison of kinetic profiles obtained in recyclability test for **2** ( $[\text{Ir}] = 5 \mu\text{M}$ ,  $[\text{NaIO}_4] = 20 \text{ mM}$ , pH 7 by phosphate buffer,  $25^\circ\text{C}$ ). Black trace: first catalytic run; red trace: the second catalytic run, carried out by recovering the solid catalyst used in the first experiment.
